# Supplementary material for: Efficient visible-light-driven reduction of hexavalent chromium catalyzed by conjugated organic species modified hourglass-type phosphomolybdate hybrids
Source: Royal Society of Chemistry journal article supplement (doi:10.1039/d1ce01467f), 2021-12-15
Supplement: d1ce01467f1.pdf [file d1ce01467f1.pdf]

## Supporting Information

# Efficient Visible-Light-Driven Reduction of Hexavalent Chromium Catalyzed by Conjugated Organic Species Modified Hourglass-type Phosphomolybdate Hybrids

Hao-Xue Bi, Xiao-Yu Yin, Xiu-Juan Zhang, Yuan-Yuan Ma\*, Zhan-Gang Han\*

Hebei Key Laboratory of Organic Functional Molecules, National Demonstration Center for Experimental Chemistry Education, College of Chemistry and Materials Science, Hebei Normal University, Shijiazhuang, Hebei 050024, People's Republic of China.

Email: mayy334@hebtu.edu.cn; hanzg116@126.com; hanzg116@hebtu.edu.cn

### CONTENTS:

1. Experimental Section
2. Supplementary Figures
3. Supplementary Tables

## 1. Experimental Section

### 1.1 Materials and measurements

All chemical reagents were commercially available. FTIR-8900 infrared spectrometer was used to collect the infrared spectra in the range of 400-4000  $\text{cm}^{-1}$  (KBr pellet); Bruker AXS D8 advance X-ray powder diffractometer was used to measure the X-ray powder diffraction; DTG-60A thermogravimetric analyzer was used to characterize the thermogravimetric spectra in the range of room temperature to 600  $^{\circ}\text{C}$ , and cyclic voltammetry curves were performed at CHI760E electrochemical workstation produced by Shanghai Chenhua. The UV-Vis DRS spectra of crystals were determined by Agilent Cary 5000 UV-Vis spectrophotometer ( $\text{BaSO}_4$  as the standard sample); UV-Vis Spectrum was analyzed by UV-2600 UV-Vis spectrophotometer.

### 1.2 Single-crystal X-ray diffraction

The crystal diffraction data were collected by using a Smart Apex CCD diffractometer with  $\text{Mo K}\alpha$  monochromated radiation ( $\lambda = 0.71073 \text{ \AA}$ ) at 296(2) K. The crystal structures of **1–4** were resolved by direct methods and refined by the full matrix least-squares methods on  $F^2$  using the *SHELXTL* crystallographic program package. Except for lattice water, all non-hydrogen atoms were anisotropic. The crystallographic data and structure refinement details for crystals **1–4** (CCDC 2076438, 2076444, 2076445 and 2076446) are summarized in Table S1. Typical bond lengths and angles are also listed in Tables S2-S9.

## 2. Supplementary Figures

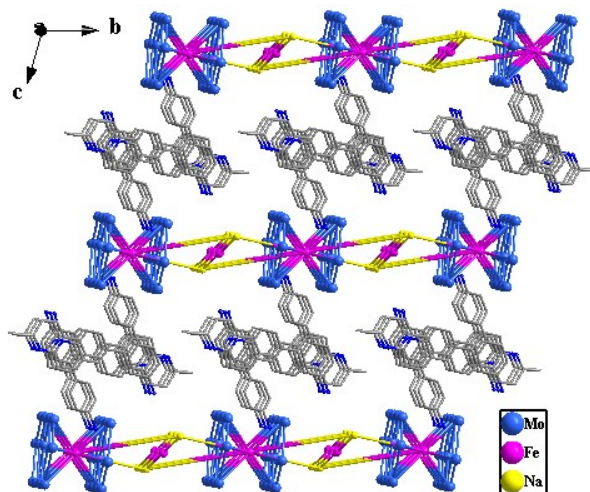

Fig. S1 A simplified diagram of the 3D structure in crystal.

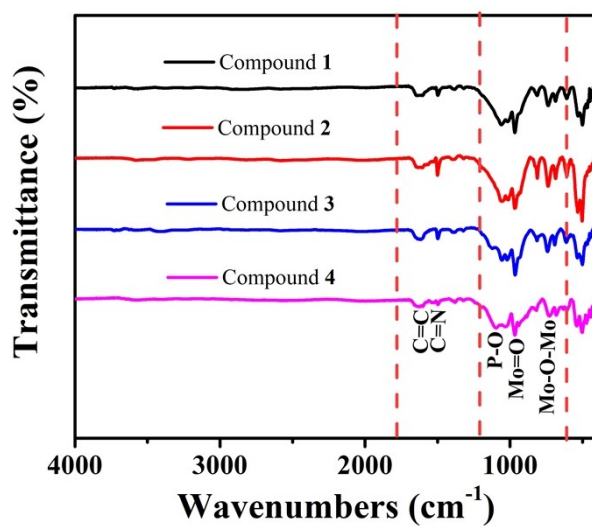

Fig. S2 IR spectra of crystals 1-4 (KBr pellets as background).

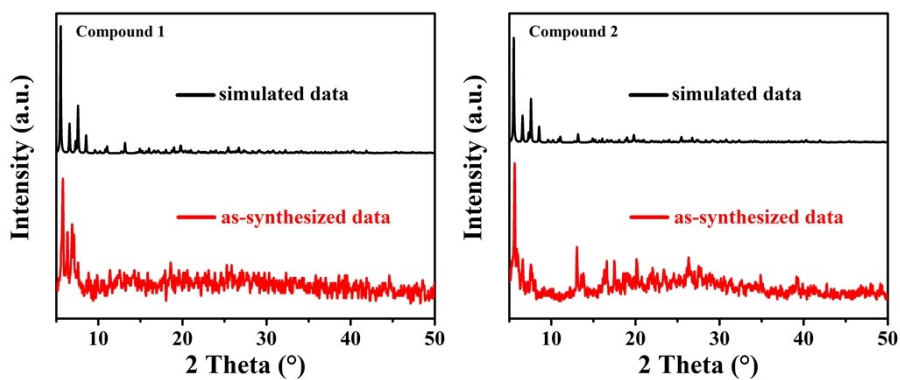

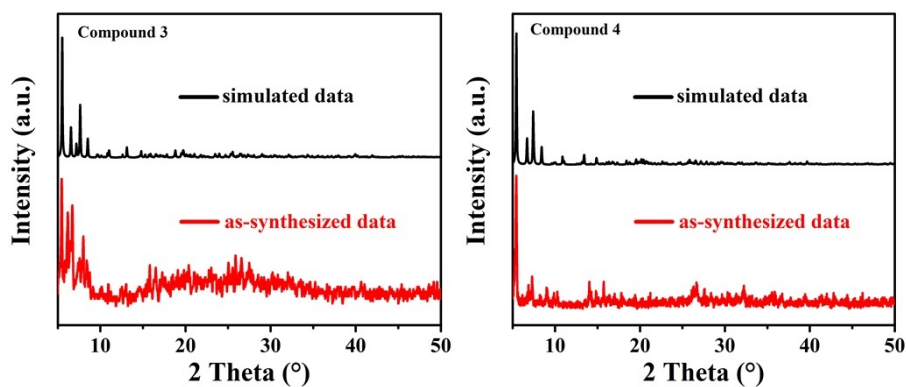

Fig. S3 Powder diffraction patterns of crystals 1-4.

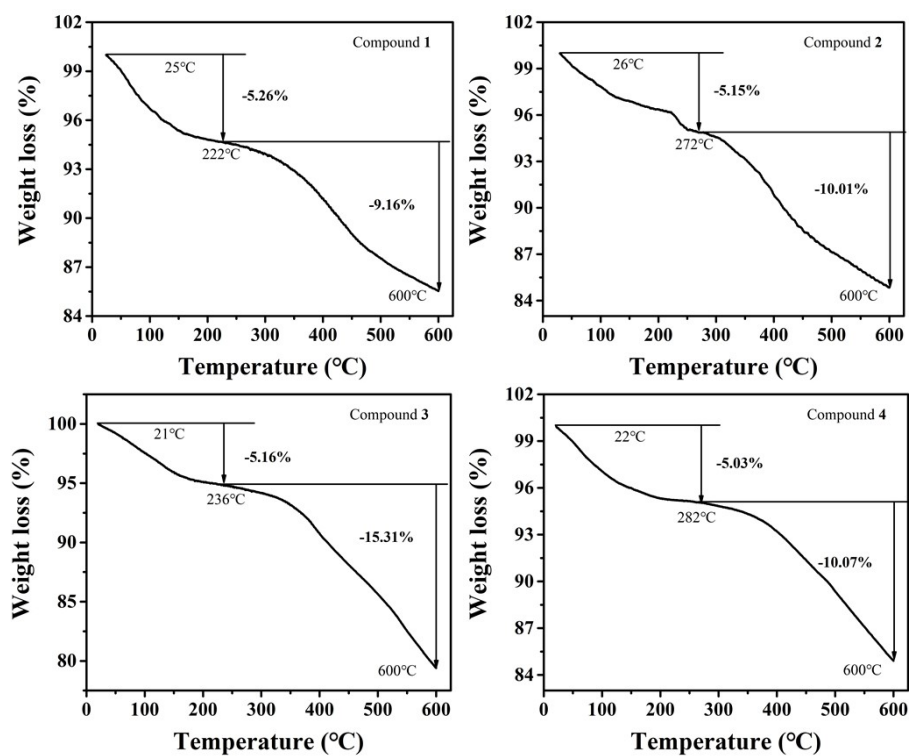

Fig. S4 TG curves of crystals 1-4.

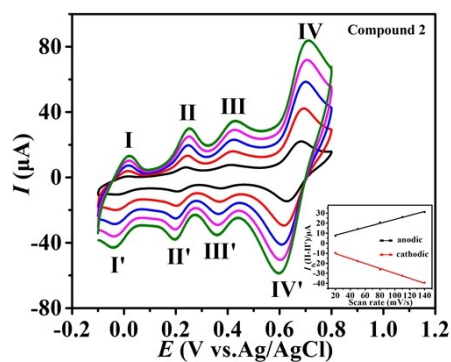

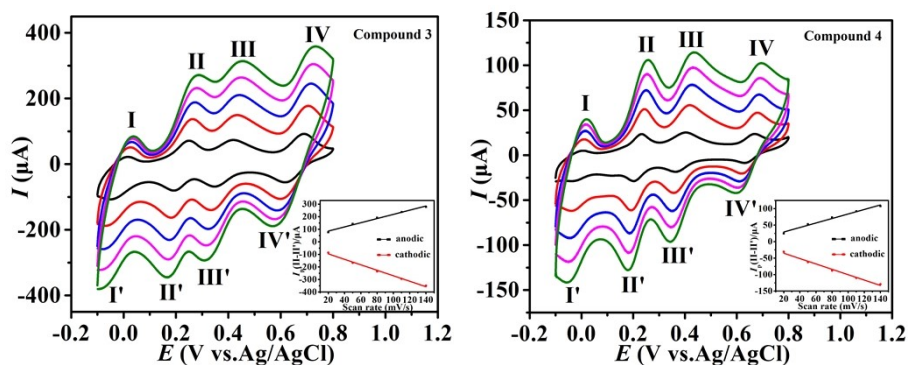

**Fig. S5** Cyclic voltammograms of 1-GCE, 2-GCE, 3-GCE and 4-GCE in the 0.5 M H<sub>2</sub>SO<sub>4</sub> solution at different scan rates (20, 50, 80, 110, and 140 mV·s<sup>-1</sup>). The insets are plots of peak current of peak (II–II') versus scan rate.

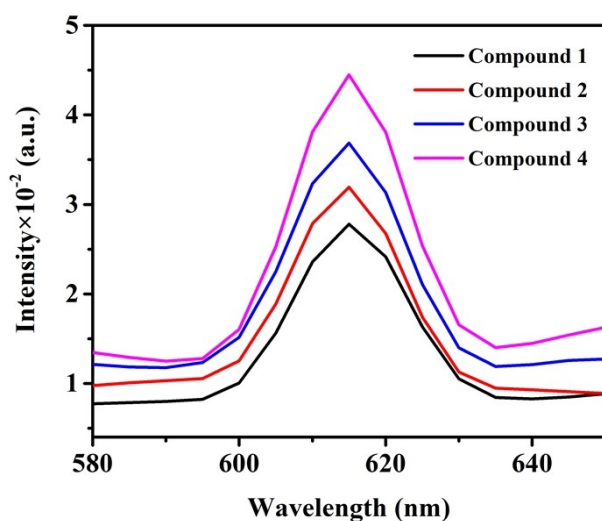

**Fig. S6** Solid-state emission spectra of hybrids 1-4.

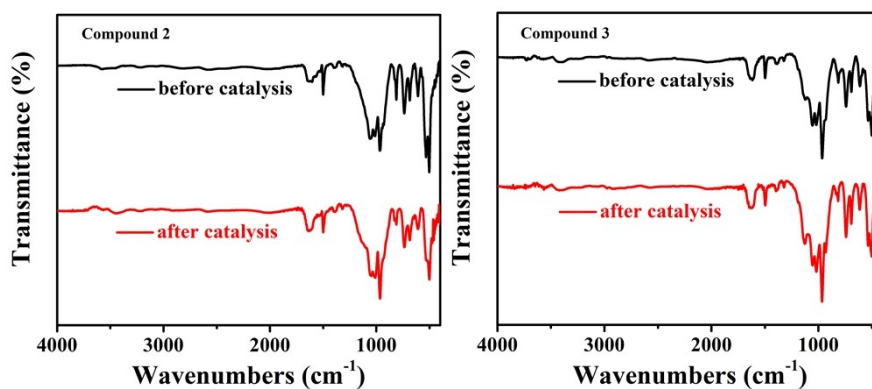

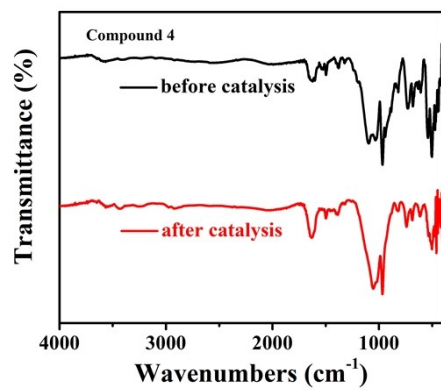

Fig. S7 Comparison of IR spectra of the fresh 2-4 and after catalysis.

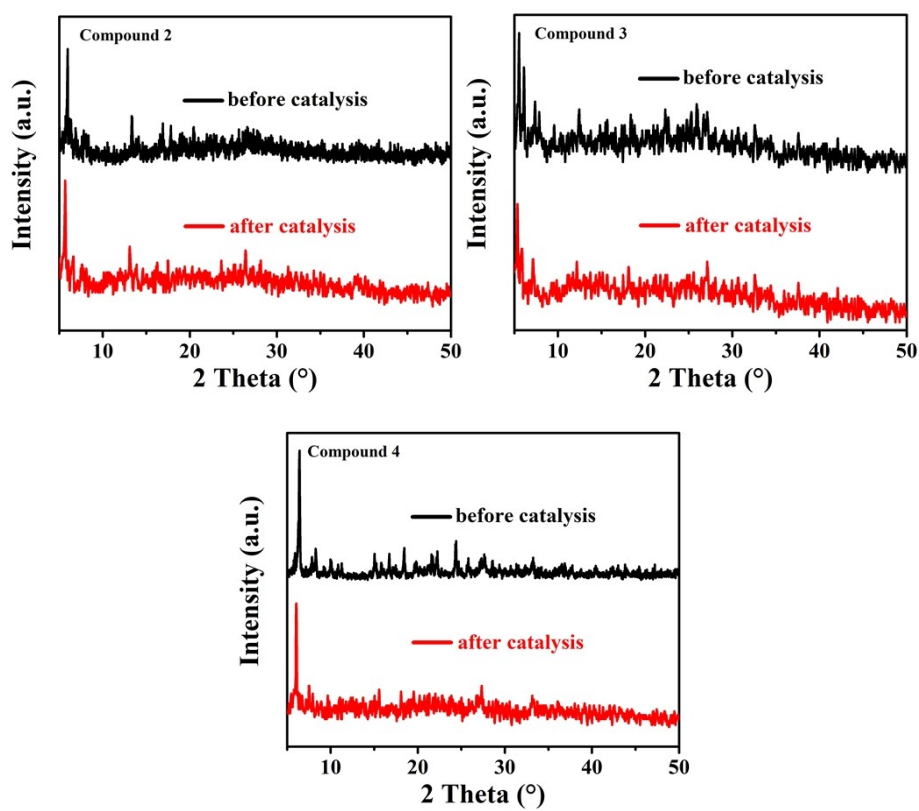

Fig. S8 Comparison of XRD patterns of the fresh 2-4 and after catalysis.

### 3. Supplementary Tables

**Table S1** Crystal data and structural refinement details for crystals 1-4.

| Crystal                                  | 1                                                                                                               | 2                                                                                                                              | 3                                                                                                                 | 4                                                                                                                              |
|------------------------------------------|-----------------------------------------------------------------------------------------------------------------|--------------------------------------------------------------------------------------------------------------------------------|-------------------------------------------------------------------------------------------------------------------|--------------------------------------------------------------------------------------------------------------------------------|
| Empirical formula                        | C <sub>64</sub> H <sub>64</sub> Fe <sub>2</sub> Mo <sub>12</sub> N <sub>8</sub> Na <sub>2</sub> O <sub>71</sub> | C <sub>64</sub> H <sub>62</sub> Co <sub>2</sub> Mo <sub>12</sub> N <sub>8</sub> Na <sub>2</sub> O <sub>70</sub> P <sub>8</sub> | C <sub>64</sub> H <sub>52</sub> Mn <sub>2</sub> Mo <sub>12</sub> N <sub>8</sub> Na <sub>2</sub> O <sub>71</sub> P | C <sub>64</sub> H <sub>54</sub> Zn <sub>2</sub> Mo <sub>12</sub> N <sub>8</sub> Na <sub>2</sub> O <sub>70</sub> P <sub>8</sub> |
| Formula weight                           | 3637.95                                                                                                         | 3626.09                                                                                                                        | 3654.01                                                                                                           | 3633.79                                                                                                                        |
| Crystal system                           | Triclinic                                                                                                       | Triclinic                                                                                                                      | triclinic                                                                                                         | triclinic                                                                                                                      |
| Space group                              | P-1                                                                                                             | P-1                                                                                                                            | P-1                                                                                                               | P-1                                                                                                                            |
| <i>a</i> (Å)                             | 11.853(2)                                                                                                       | 11.8560(10)                                                                                                                    | 11.8092(12)                                                                                                       | 12.079(2)                                                                                                                      |
| <i>b</i> (Å)                             | 14.016(2)                                                                                                       | 14.0079(12)                                                                                                                    | 14.1430(15)                                                                                                       | 13.620(2)                                                                                                                      |
| <i>c</i> (Å)                             | 16.932(3)                                                                                                       | 16.8886(14)                                                                                                                    | 17.0587(19)                                                                                                       | 17.023(3)                                                                                                                      |
| $\alpha, \beta, \gamma$ (°)              | 105.883(3), 99.311(3),<br>92.164(3)                                                                             | 105.9222(13), 99.3799(14),<br>92.0586(15)                                                                                      | 106.8435(17), 100.0004(16),<br>91.8117(16)                                                                        | 75.738(3), 80.286(3), 89.388(3)                                                                                                |
| Volume (Å <sup>3</sup> ), <i>Z</i>       | 2659.9(8), 1                                                                                                    | 2651.5(4), 1                                                                                                                   | 2675.3(5), 1                                                                                                      | 2674.0(8), 1                                                                                                                   |
| Density(calculated)(Mg)                  | 2.271                                                                                                           | 2.271                                                                                                                          | 2.268                                                                                                             | 2.257                                                                                                                          |
| Absorption                               | 1.870                                                                                                           | 1.914                                                                                                                          | 1.831                                                                                                             | 1.894                                                                                                                          |
| <i>F</i> <sub>(000)</sub>                | 1770.0                                                                                                          | 1762                                                                                                                           | 1770.0                                                                                                            | 1766.0                                                                                                                         |
| Crystal size (mm <sup>3</sup> )          | 0.2 × 0.15 × 0.1                                                                                                | 0.2 × 0.18 × 0.16                                                                                                              | 0.2 × 0.18 × 0.16                                                                                                 | 0.2 × 0.18 × 0.16                                                                                                              |
| $\theta$ (°)                             | 3.36 to 56.516                                                                                                  | 1.275 to 25.027                                                                                                                | 3.02 to 56.562                                                                                                    | 3.086 to 56.414                                                                                                                |
| Reflections collected                    | 16442                                                                                                           | 13390                                                                                                                          | 16597                                                                                                             | 15654                                                                                                                          |
| Independent reflections                  | 12017 [ <i>R</i> <sub>(int)</sub> = 0.0355]                                                                     | 9277 [ <i>R</i> <sub>(int)</sub> = 0.0238]                                                                                     | 12158 [ <i>R</i> <sub>(int)</sub> = 0.0230]                                                                       | 11790 [ <i>R</i> <sub>(int)</sub> = 0.0269]                                                                                    |
| Max. and min.                            | 0.829 and 0.721                                                                                                 | 0.7452 and 0.6787                                                                                                              | 0.746 and 0.700                                                                                                   | 0.739 and 0.692                                                                                                                |
| Data/restraints/paramet                  | 12017/1020/774                                                                                                  | 9277/750/744                                                                                                                   | 12158/726/752                                                                                                     | 11790/840/755                                                                                                                  |
| Goodness-of-fit on <i>F</i> <sup>2</sup> | 1.018                                                                                                           | 1.022                                                                                                                          | 1.025                                                                                                             | 1.038                                                                                                                          |
| Final <i>R</i> indices                   | <i>R</i> <sub>1</sub> = 0.0587, <i>wR</i> <sub>2</sub> = 0.1579                                                 | <i>R</i> <sub>1</sub> = 0.0466, <i>wR</i> <sub>2</sub> = 0.1248                                                                | <i>R</i> <sub>1</sub> = 0.0483, <i>wR</i> <sub>2</sub> = 0.1311                                                   | <i>R</i> <sub>1</sub> = 0.0601, <i>wR</i> <sub>2</sub> = 0.1444                                                                |
| <i>R</i> indices (all data)              | <i>R</i> <sub>1</sub> = 0.0790, <i>wR</i> <sub>2</sub> = 0.1754                                                 | <i>R</i> <sub>1</sub> = 0.0659, <i>wR</i> <sub>2</sub> = 0.1385                                                                | <i>R</i> <sub>1</sub> = 0.0681, <i>wR</i> <sub>2</sub> = 0.1451                                                   | <i>R</i> <sub>1</sub> = 0.0944, <i>wR</i> <sub>2</sub> = 0.1727                                                                |

$$^a R_1 = \sum ||F_o| - |F_c|| / \sum |F_o|; wR_2 = \{ \sum [w(F_o^2 - F_c^2)^2] / \sum [w(F_o^2)^2] \}^{1/2}.$$

**Table S2** Selected bond lengths (Å) and bond angles (°) of compound 1.

|                          |           |                            |          |
|--------------------------|-----------|----------------------------|----------|
| Mo(1)-Mo(4)              | 2.5932(9) | P(4) -O(30)                | 1.505(5) |
| Mo(1)-O(5)               | 1.974(4)  | P(4)-Na(1) <sup>i</sup>    | 3.417(6) |
| Mo(1)-O(8)               | 2.127(5)  | P(3)-O(26)                 | 1.529(5) |
| Mo(1)-O(11)              | 1.936(5)  | P(3)-O(3) <sup>i</sup>     | 1.518(6) |
| Mo(1)-O(13) <sup>i</sup> | 2.290(4)  | P(3)-O(4)                  | 1.514(5) |
| Mo(1)-O(22)              | 1.681(5)  | P(3)-O(32)                 | 1.573(6) |
| Mo(1)-O(25)              | 2.077(5)  | P(3)-Na(1)                 | 3.409(5) |
| Mo(2)-Mo(6)              | 2.5818(9) | P(1) -O(21)                | 1.542(6) |
| Mo(2)-O(6)               | 1.987(4)  | P(1) -O(28)                | 1.530(6) |
| Mo(2)-O(8) <sup>i</sup>  | 2.146(5)  | P(1) -O(2)                 | 1.597(6) |
| Mo(2)-O(12)              | 2.067(4)  | P(1) -O(31)                | 1.506(6) |
| Mo(2)-O(13)              | 2.267(4)  | O(19)-Na(1) <sup>i</sup>   | 2.600(7) |
| Mo(2)-O(14)              | 1.920(5)  | O(24)-Na(1) <sup>iii</sup> | 2.490(7) |
| Mo(2)-O(15)              | 1.687(5)  | O(27)-Na(1) <sup>i</sup>   | 2.643(8) |
| Mo(3)-Mo(5)              | 2.5938(9) | O(30)-Na(1) <sup>i</sup>   | 2.681(8) |
| Mo(3)-O(7)               | 1.973(5)  | O(32)-Na(1)                | 2.426(8) |

---

|                            |           |                  |           |
|----------------------------|-----------|------------------|-----------|
| Mo(3)-O(10)                | 2.293(4)  | N(2)-C(47)       | 1.451(10) |
| Mo(3)-O(17) <sup>i</sup>   | 2.090(5)  | N(1)-C(44)       | 1.396(11) |
| Mo(3)-O(18)                | 1.679(5)  | C(40)-C(43)      | 1.477(11) |
| Mo(3)-O(19)                | 1.928(5)  | C(40)-C(48)      | 1.375(11) |
| Mo(3)-O(3)                 | 2.071(5)  | C(40)-C(52)      | 1.394(12) |
| Mo(4)-O(5)                 | 1.976(4)  | C(41)-C(47)      | 1.352(12) |
| Mo(4)-O(10) <sup>i</sup>   | 2.297(5)  | C(41)-C(48)      | 1.404(12) |
| Mo(4)-O(11)                | 1.946(5)  | C(42)-C(43)      | 1.404(12) |
| Mo(4)-O(17)                | 2.105(5)  | C(42)-C(60)      | 1.392(12) |
| Mo(4)-O(26)                | 2.065(5)  | C(43)-C(50)      | 1.378(12) |
| Mo(4)-O(29)                | 1.668(5)  | C(44)-C(55)      | 1.380(12) |
| Mo(5)-O(7)                 | 1.975(5)  | C(44)-C(60)      | 1.387(12) |
| Mo(5)-O(9)                 | 2.104(5)  | C(46)-C(47)      | 1.376(12) |
| Mo(5)-O(16)                | 2.250(4)  | C(46)-C(52)      | 1.411(13) |
| Mo(5)-O(19)                | 1.942(5)  | C(50)-C(55)      | 1.378(12) |
| Mo(5)-O(20)                | 1.668(5)  | Na(1)-O(1W)      | 2.407(11) |
| Mo(5)-O(21)                | 2.073(5)  | Na(1)-O(4W)      | 3.00(2)   |
| Mo(6)-O(6)                 | 1.982(5)  | N(3)-C(4)        | 1.378(15) |
| Mo(6)-O(9)                 | 2.099(4)  | N(3)-C(10)       | 1.337(14) |
| Mo(6)-O(14)                | 1.950(5)  | C(4)-C(7)        | 1.402(15) |
| Mo(6)-O(16)                | 2.286(4)  | C(4)-C(8)        | 1.424(14) |
| Mo(6)-O(23)                | 1.673(5)  | C(0AA)-C(6)      | 1.464(17) |
| Mo(6)-O(28)                | 2.037(5)  | C(0AA)-C(11)     | 1.418(15) |
| Fe(2)-O(27) <sup>ii</sup>  | 2.123(5)  | C(0AA)-C(12)     | 1.384(16) |
| Fe(2)-O(27)                | 2.123(5)  | C(6)-C(15)       | 1.342(17) |
| Fe(2)-O(30) <sup>iii</sup> | 2.059(5)  | C(6)-C(18)       | 1.381(16) |
| Fe(2)-O(30)                | 2.059(5)  | C(7)-C(12)       | 1.361(16) |
| Fe(2)-O(1)                 | 2.153(6)  | C(8)-C(9)        | 1.385(15) |
| Fe(2)-O(1) <sup>ii</sup>   | 2.153(6)  | C(8)-C(11)       | 1.386(16) |
| Fe(1)-O(5) <sup>i</sup>    | 2.205(4)  | C(9)-C(14)       | 1.357(17) |
| Fe(1)-O(5)                 | 2.205(4)  | C(10)-C(14)      | 1.437(16) |
| Fe(1)-O(6) <sup>i</sup>    | 2.130(4)  | C(10)-C(19)      | 1.475(17) |
| Fe(1)-O(6)                 | 2.130(4)  | N(4)-C(16)       | 1.410(18) |
| Fe(1)-O(7)                 | 2.205(4)  | N(4)-C(17)       | 1.130(16) |
| Fe(1)-O(7) <sup>i</sup>    | 2.205(4)  | C(15)-C(21)      | 1.439(19) |
| P(2)-O(12)                 | 1.534(5)  | C(16)-C(21)      | 1.381(19) |
| P(2)-O(24)                 | 1.585(5)  | C(16)-C(22)      | 1.34(2)   |
| P(2)-O(25) <sup>i</sup>    | 1.527(5)  | C(17)-C(25)      | 1.33(2)   |
| P(2)-O(27) <sup>ii</sup>   | 1.497(5)  | C(17)-C(5)       | 1.69(2)   |
| P(2)-Na(1) <sup>iii</sup>  | 3.184(5)  | C(18)-C(22)      | 1.379(19) |
| P(4)-O(10)                 | 1.544(5)  | C(21)-C(26)      | 1.312(19) |
| P(4)-O(13)                 | 1.543(4)  | C(25)-C(26)      | 1.51(2)   |
| P(4)-O(16)                 | 1.555(5)  | O(13)-P(4)-O(10) | 107.1(3)  |
| O(5)-Mo(1)-Mo(4)           | 49.01(13) | O(30)-P(4)-O(16) | 108.7(3)  |

---



|                                 |            |                                               |           |
|---------------------------------|------------|-----------------------------------------------|-----------|
| O(5)-Mo(1)-O(8)                 | 85.74(18)  | O(26)-P(3)-O(32)                              | 107.5(3)  |
| O(8)-Mo(1)-Mo(4)                | 73.24(16)  | O(26)-P(3)-Na(1)                              | 114.5(2)  |
| O(8)-Mo(1)-O(13) <sup>i</sup>   | 48.25(14)  | O(4)-P(3)-O(26)                               | 111.2(3)  |
| O(11)-Mo(1)-Mo(4)               | 95.50(19)  | O(4)-P(3)-O(3) <sup>i</sup>                   | 109.6(3)  |
| O(11)-Mo(1)-O(5)                | 156.59(19) | O(4)-P(3)-O(32)                               | 110.7(3)  |
| O(13) <sup>i</sup> -Mo(1)-Mo(4) | 100.64(17) | O(21)-P(1)-O(2)                               | 106.5(3)  |
| O(22)-Mo(1)-Mo(4)               | 102.8(2)   | O(28)-P(1)-O(21)                              | 111.1(3)  |
| O(6)-Mo(2)-Mo(6)                | 85.90(18)  | O(28)-P(1)-O(2)                               | 107.7(3)  |
| O(8) <sup>i</sup> -Mo(2)-Mo(6)  | 73.37(17)  | O(31)-P(1)-O(2)                               | 106.7(4)  |
| O(12)-Mo(2)-O(13)               | 90.57(11)  | Mo(1)-O(5)-Mo(4)                              | 82.05(17) |
| O(13)-Mo(2)-Mo(6)               | 48.66(14)  | O(23)-Mo(6)-O(6)                              | 102.4(2)  |
| O(14)-Mo(2)-Mo(6)               | 96.35(19)  | O(23)-Mo(6)-O(9)                              | 97.7(2)   |
| O(15)-Mo(2)-Mo(6)               | 103.4(2)   | O(23)-Mo(6)-O(14)                             | 106.2(2)  |
| O(7)-Mo(3)-Mo(5)                | 81.54(17)  | O(23)-Mo(6)-O(16)                             | 170.1(2)  |
| O(10)-Mo(3)-Mo(5)               | 134.99(13) | O(23)-Mo(6)-O(28)                             | 95.9(2)   |
| O(17) <sup>i</sup> -Mo(3)-Mo(5) | 73.22(17)  | O(28)-Mo(6)-O(9)                              | 83.0(2)   |
| O(18)-Mo(3)-O(3)                | 48.13(14)  | O(28)-Mo(6)-O(16)                             | 81.0(2)   |
| O(19)-Mo(3)-O(7)                | 81.66(19)  | O(27)-Fe(2)-O(27) <sup>ii</sup>               | 180.0     |
| O(5)-Mo(4)-O(17)                | 160.1(2)   | O(27) <sup>ii</sup> -Fe(2)-O(1) <sup>ii</sup> | 93.7(2)   |
| O(5)-Mo(4)-O(26)                | 88.58(11)  | O(27)-Fe(2)-O(1)                              | 93.7(2)   |
| O(17)-Mo(4)-O(10) <sup>i</sup>  | 133.44(14) | O(27)-Fe(2)-O(1) <sup>ii</sup>                | 86.3(2)   |
| O(26)-Mo(4)-Mo(1)               | 79.89(19)  | O(30)-Fe(2)-O(27)                             | 83.12(19) |
| O(29)-Mo(4)-O(11)               | 98.3(2)    | O(30) <sup>ii</sup> -Fe(2)-O(1) <sup>ii</sup> | 87.5(2)   |
| O(20)-Mo(5)-Mo(3)               | 103.1(2)   | O(30)-Fe(2)-O(1) <sup>ii</sup>                | 92.5(2)   |
| O(20)-Mo(5)-O(7)                | 96.9(2)    | O(30)-Fe(2)-O(1)                              | 87.5(2)   |
| O(20)-Mo(5)-O(21)               | 133.64(16) | O(30) <sup>ii</sup> -Fe(2)-O(1)               | 92.5(2)   |
| O(21)-Mo(5)-Mo(3)               | 85.3(2)    | O(1)-Fe(2)-O(1) <sup>ii</sup>                 | 180.0     |
| O(21)-Mo(5)-O(9)                | 78.47(19)  | O(5) <sup>i</sup> -Fe(1)-O(5)                 | 180.0     |
| O(21)-Mo(5)-O(16)               | 49.51(13)  | O(5) <sup>i</sup> -Fe(1)-O(7) <sup>i</sup>    | 83.98(17) |
| O(6)-Mo(6)-Mo(2)                | 87.02(18)  | O(5) <sup>i</sup> -Fe(1)-O(7)                 | 96.02(17) |
| O(6)-Mo(6)-O(9)                 | 79.73(17)  | O(5)-Fe(1)-O(7)                               | 83.98(17) |
| O(9)-Mo(6)-Mo(2)                | 72.58(17)  | O(5)-Fe(1)-O(7) <sup>i</sup>                  | 96.02(17) |
| O(14)-Mo(6)-O(28)               | 86.5(2)    |                                               |           |

Symmetry codes: i = -x, 1-y, -z; ii = -x, 2-y, -z; iii = x, -1+y, z.

**Table S3** Selected bond lengths (Å) and bond angles (°) of compound **2**.

|                         |            |                         |          |
|-------------------------|------------|-------------------------|----------|
| Mo(1)-Mo(4)             | 2.5898(9)  | P(2)-Na(1)              | 3.353(5) |
| Mo(1)-O(7)              | 1.975(5)   | P(2)-O(15)              | 1.553(5) |
| Mo(1)-O(8) <sup>i</sup> | 2.111(5)   | P(2)-O(25)              | 1.500(5) |
| Mo(1)-O(11)             | 2.286(5)   | P(3)-Na(1)              | 3.423(5) |
| Mo(1)-O(14)             | 1.939(5)   | P(3)-O(27) <sup>i</sup> | 1.531(6) |
| Mo(1)-O(23)             | 1.677(5)   | P(3)-O(31)              | 1.508(6) |
| Mo(1)-O(32)             | 2.062(5)   | P(3)-O(33)              | 1.532(6) |
| Mo(2)-Mo(3)             | 2.5769(10) | P(3)-O(37)              | 1.584(6) |
| Mo(2)-O(5)              | 1.977(5)   | P(4)-O(21)              | 1.540(6) |

|                           |            |                           |           |
|---------------------------|------------|---------------------------|-----------|
| Mo(2)-O(8)                | 2.137(5)   | P(4)-O(29)                | 1.534(7)  |
| Mo(2)-O(11) <sup>i</sup>  | 2.262(5)   | P(4)-O(34)                | 1.613(7)  |
| Mo(2)-O(12)               | 1.920(5)   | P(4)-O(36)                | 1.495(6)  |
| Mo(2)-O(16)               | 2.059(5)   | Na(1)-O(19)               | 2.625(7)  |
| Mo(2)-O(24)               | 1.674(5)   | Na(1)-O(20)               | 2.554(7)  |
| Mo(3)-O(5)                | 1.984(5)   | Na(1)-O(25)               | 2.576(7)  |
| Mo(3)-O(9)                | 2.094(5)   | Na(1)-O(26) <sup>ii</sup> | 2.527(7)  |
| Mo(3)-O(12)               | 1.932(5)   | Na(1)-O(37)               | 2.419(8)  |
| Mo(3)-O(15)               | 2.285(5)   | Na(1)-O(1W)               | 2.419(10) |
| Mo(3)-O(28)               | 1.673(6)   | N(2)-C(52)                | 1.403(12) |
| Mo(3)-O(29)               | 2.035(6)   | N(1)-C(47)                | 1.470(11) |
| Mo(4)-O(7)                | 1.984(5)   | C(41)-C(43)               | 1.395(13) |
| Mo(4)-O(10) <sup>i</sup>  | 2.293(5)   | C(41)-C(57)               | 1.383(14) |
| Mo(4)-O(14)               | 1.941(5)   | C(42)-C(45)               | 1.370(14) |
| Mo(4)-O(18)               | 2.099(5)   | C(42)-C(47)               | 1.376(13) |
| Mo(4)-O(27)               | 2.056(5)   | C(43)-C(44)               | 1.492(13) |
| Mo(4)-O(30)               | 1.665(5)   | C(43)-C(48)               | 1.386(13) |
| Mo(5)-Mo(6)               | 2.5899(10) | C(44)-C(45)               | 1.383(13) |
| Mo(5)-O(6)                | 1.984(5)   | C(44)-C(50)               | 1.383(13) |
| Mo(5)-O(9)                | 2.099(5)   | C(46)-C(47)               | 1.385(13) |
| Mo(5)-O(15)               | 2.241(5)   | C(46)-C(50)               | 1.390(14) |
| Mo(5)-O(19)               | 1.942(5)   | C(48)-C(51)               | 1.368(14) |
| Mo(5)-O(21)               | 2.074(6)   | C(49)-C(53)               | 1.406(16) |
| Mo(5)-O(22)               | 1.663(6)   | C(49)-N(3)                | 1.385(16) |
| Mo(6)-O(6)                | 1.980(5)   | C(49)-C(66)               | 1.397(17) |
| Mo(6)-O(10)               | 2.279(5)   | C(51)-C(52)               | 1.384(14) |
| Mo(6)-O(17)               | 1.678(6)   | C(52)-C(57)               | 1.397(14) |
| Mo(6)-O(18) <sup>i</sup>  | 2.086(5)   | C(53)-C(61)               | 1.445(18) |
| Mo(6)-O(19)               | 1.931(6)   | C(53)-C(70)               | 1.351(17) |
| Mo(6)-O(33)               | 2.062(6)   | C(54)-C(65)               | 1.428(18) |
| Co(1)-O(5) <sup>i</sup>   | 2.121(5)   | C(54)-C(70)               | 1.350(19) |
| Co(1)-O(5)                | 2.121(5)   | C(55)-C(58)               | 1.408(18) |
| Co(1)-O(6) <sup>i</sup>   | 2.179(5)   | C(55)-C(66)               | 1.342(19) |
| Co(1)-O(6)                | 2.179(5)   | N(3)-C(65)                | 1.326(15) |
| Co(1)-O(7) <sup>i</sup>   | 2.177(5)   | C(58)-C(61)               | 1.372(16) |
| Co(1)-O(7)                | 2.177(5)   | C(58)-C(69)               | 1.458(19) |
| Co(2)-O(20)               | 2.153(6)   | C(62)-C(67)               | 1.36(2)   |
| Co(2)-O(20) <sup>ii</sup> | 2.152(6)   | C(62)-C(69)               | 1.406(18) |
| Co(2)-O(25)               | 2.074(5)   | C(64)-C(69)               | 1.363(18) |
| Co(2)-O(25) <sup>ii</sup> | 2.074(5)   | C(64)-C(8)                | 1.419(17) |
| Co(2)-O(35)               | 2.113(6)   | C(65)-C(75)               | 1.483(19) |
| Co(2)-O(35) <sup>ii</sup> | 2.113(6)   | C(67)-C(4)                | 1.301(17) |
| P(1)-Na(1) <sup>ii</sup>  | 3.162(5)   | C(5)-C(3)                 | 1.61(2)   |
| P(1)-O(16)                | 1.538(5)   | N(4)-C(4)                 | 1.359(6)  |

|                                |            |                                            |            |
|--------------------------------|------------|--------------------------------------------|------------|
| P(1)-O(20) <sup>ii</sup>       | 1.488(6)   | N(4)-C(3)                                  | 1.359(6)   |
| P(1)-O(26)                     | 1.592(5)   | C(4)-C(8)                                  | 1.359(6)   |
| P(1)-O(32) <sup>ii</sup>       | 1.543(6)   | C(8)-C(1)                                  | 1.359(6)   |
| P(2)-O(10)                     | 1.548(5)   | C(1)-C(2)                                  | 1.359(6)   |
| P(2)-O(11) <sup>ii</sup>       | 1.548(5)   | C(2)-C(3)                                  | 1.359(6)   |
| O(7)-Mo(1)-O(8) <sup>ii</sup>  | 85.5(2)    | O(19)-Mo(6)-Mo(5)                          | 95.7(2)    |
| O(7)-Mo(1)-O(11)               | 80.31(19)  | O(31)-P(3)-O(27)#1                         | 111.5(3)   |
| O(7)-Mo(1)-O(32)               | 158.8(2)   | O(31)-P(3)-O(33)                           | 109.7(4)   |
| O(14)-Mo(1)-O(7)               | 95.7(2)    | O(31)-P(3)-O(37)                           | 110.4(4)   |
| O(14)-Mo(1)-O(8) <sup>ii</sup> | 156.7(2)   | O(33)-P(3)-O(37)                           | 105.3(4)   |
| O(14)-Mo(1)-O(11)              | 83.9(2)    | O(21)-P(4)-O(34)                           | 106.2(4)   |
| O(14)-Mo(1)-O(32)              | 86.9(2)    | O(29)-P(4)-O(21)                           | 110.9(3)   |
| O(5)-Mo(2)-Mo(3)               | 49.54(14)  | O(29)-P(4)-O(34)                           | 107.1(4)   |
| O(5)-Mo(2)-O(8)                | 85.6(2)    | O(36)-P(4)-O(21)                           | 113.6(4)   |
| O(5)-Mo(2)-O(11) <sup>i</sup>  | 81.26(19)  | O(36)-P(4)-O(29)                           | 111.3(4)   |
| O(5)-Mo(2)-O(16)               | 159.4(2)   | O(36)-P(4)-O(34)                           | 107.3(4)   |
| O(16)-Mo(2)-O(8)               | 85.1(2)    | Mo(2)-O(5)-Mo(3)                           | 81.17(19)  |
| O(16)-Mo(2)-O(11) <sup>i</sup> | 78.49(19)  | Mo(1) <sup>i</sup> -O(8)-Mo(2)             | 111.5(2)   |
| O(5)-Mo(3)-O(9)                | 87.4(2)    | Mo(3)-O(9)-Mo(5)                           | 112.5(2)   |
| O(5)-Mo(3)-O(15)               | 79.81(19)  | Mo(6)-O(10)-Mo(4) <sup>i</sup>             | 99.69(19)  |
| O(5)-Mo(3)-O(29)               | 160.2(2)   | Mo(2) <sup>i</sup> -O(11)-Mo(1)            | 101.07(18) |
| O(9)-Mo(3)-Mo(2)               | 135.45(14) | Mo(2)-O(12)-Mo(3)                          | 84.0(2)    |
| O(9)-Mo(3)-O(15)               | 72.66(19)  | O(5)-Co(1)-O(7) <sup>i</sup>               | 180.0      |
| O(7)-Mo(4)-O(18)               | 85.9(2)    | O(6)-Co(1)-O(6) <sup>i</sup>               | 83.70(19)  |
| O(7)-Mo(4)-O(27)               | 160.0(2)   | O(7)-Co(1)-O(6)                            | 96.30(19)  |
| O(27)-Mo(4)-O(18)              | 85.2(2)    | O(7)-Co(1)-O(6) <sup>i</sup>               | 96.30(19)  |
| O(30)-Mo(4)-O(14)              | 105.0(3)   | O(7) <sup>i</sup> -Co(1)-O(6)              | 83.70(19)  |
| O(30)-Mo(4)-O(18)              | 98.2(3)    | O(7) <sup>i</sup> -Co(1)-O(6) <sup>i</sup> | 180.0      |
| O(30)-Mo(4)-O(27)              | 97.5(3)    | O(7) <sup>i</sup> -Co(1)-O(7)              | 180.0      |
| O(6)-Mo(5)-Mo(6)               | 49.14(14)  | O(25)-Co(2)-O(20)                          | 180.0      |
| O(6)-Mo(5)-O(9)                | 85.7(2)    | O(25)-Co(2)-O(25) <sup>i</sup>             | 87.6(2)    |
| O(9)-Mo(5)-O(15)               | 73.49(19)  | O(25)-Co(2)-O(35)                          | 92.4(2)    |
| O(15)-Mo(5)-Mo(6)              | 89.75(13)  | O(25)-Co(2)-O(35) <sup>i</sup>             | 92.4(2)    |
| O(19)-Mo(5)-Mo(6)              | 47.86(17)  | O(25) <sup>ii</sup> -Co(2)-O(35)           | 87.6(2)    |
| O(6)-Mo(6)-O(33)               | 88.07(13)  | O(25) <sup>ii</sup> -Co(2)-O(35)           | 87.0(2)    |
| O(10)-Mo(6)-Mo(5)              | 101.3(2)   | O(35)-Co(2)-O(20) <sup>ii</sup>            | 87.0(2)    |
| O(17)-Mo(6)-Mo(5)              | 102.0(2)   | O(35) <sup>ii</sup> -Co(2)-O(20)           | 93.0(2)    |
| O(17)-Mo(6)-O(6)               | 170.0(2)   | O(35)-Co(2)-O(20)                          | 93.0(2)    |
| O(17)-Mo(6)-O(10)              | 97.2(3)    |                                            |            |

Symmetry codes: i = 1-x, 1-y, -z; ii = 1-x, 2-y, -z.

**Table S4** Selected bond lengths (Å) and bond angles (°) of compound **3**.

|             |           |            |          |
|-------------|-----------|------------|----------|
| Mo(1)-Mo(5) | 2.5919(9) | P(2)-O(20) | 1.528(5) |
| Mo(1)-O(5)  | 1.981(4)  | P(2)-O(27) | 1.492(5) |
| Mo(1)-O(13) | 2.243(4)  | P(2)-Na(2) | 3.207(4) |

---

|                           |           |                         |           |
|---------------------------|-----------|-------------------------|-----------|
| Mo(1)-O(14)               | 2.113(5)  | P(3)-O(24)              | 1.522(5)  |
| Mo(1)-O(22)               | 1.940(5)  | P(3)-O(32) <sup>i</sup> | 1.536(5)  |
| Mo(1)-O(26)               | 1.667(5)  | P(3)-O(34)              | 1.507(5)  |
| Mo(1)-O(29)               | 2.067(5)  | P(3)-O(35)              | 1.580(5)  |
| Mo(2)-Mo(4)               | 2.5887(8) | P(4)-O(29) <sup>i</sup> | 1.539(6)  |
| Mo(2)-O(6)                | 2.124(4)  | P(4)-O(31)              | 1.523(6)  |
| Mo(2)-O(8)                | 1.967(4)  | P(4)-O(37)              | 1.594(7)  |
| Mo(2)-O(9)                | 1.936(4)  | P(4)-O(1)               | 1.498(7)  |
| Mo(2)-O(12) <sup>i</sup>  | 2.290(4)  | O(16)-Na(2)             | 2.543(6)  |
| Mo(2)-O(15)               | 2.064(4)  | O(18)-Na(2)             | 2.635(7)  |
| Mo(2)-O(21)               | 1.675(5)  | O(22)-Na(2)             | 2.634(6)  |
| Mo(3)-Mo(6)               | 2.5826(8) | O(27)-Na(2)             | 2.615(6)  |
| Mo(3)-O(6)                | 2.143(4)  | O(35)-Na(2)             | 2.423(7)  |
| Mo(3)-O(7)                | 1.974(4)  | N(1)-C(46)              | 1.479(9)  |
| Mo(3)-O(12) <sup>i</sup>  | 2.272(4)  | C(38)-C(46)             | 1.380(11) |
| Mo(3)-O(17)               | 1.915(5)  | C(38)-C(56)             | 1.372(11) |
| Mo(3)-O(20)               | 2.065(4)  | C(39)-C(49)             | 1.390(11) |
| Mo(3)-O(23)               | 1.669(5)  | C(39)-C(51)             | 1.500(11) |
| Mo(4)-O(8)                | 1.980(4)  | C(39)-C(56)             | 1.384(11) |
| Mo(4)-O(9)                | 1.938(4)  | N(2)-C(43)              | 1.396(10) |
| Mo(4)-O(11) <sup>i</sup>  | 2.289(4)  | C(41)-C(48)             | 1.391(12) |
| Mo(4)-O(19)               | 2.116(4)  | C(41)-C(51)             | 1.389(11) |
| Mo(4)-O(24)               | 2.061(5)  | C(42)-C(46)             | 1.381(11) |
| Mo(4)-O(28)               | 1.678(5)  | C(42)-C(49)             | 1.381(11) |
| Mo(5)-O(5)                | 1.964(4)  | C(43)-C(47)             | 1.386(11) |
| Mo(5)-O(11)               | 2.283(4)  | C(43)-C(48)             | 1.382(12) |
| Mo(5)-O(19) <sup>i</sup>  | 2.089(5)  | C(47)-C(55)             | 1.393(12) |
| Mo(5)-O(22)               | 1.930(5)  | C(51)-C(55)             | 1.365(11) |
| Mo(5)-O(25)               | 1.677(5)  | Na(2)-O(1W)             | 2.446(10) |
| Mo(5)-O(32)               | 2.068(5)  | N(3)-C(0AA)             | 1.391(14) |
| Mo(6)-O(7)                | 1.987(4)  | N(3)-C(14)              | 1.282(14) |
| Mo(6)-O(13) <sup>i</sup>  | 2.279(4)  | C(2AA)-C(8)             | 1.353(15) |
| Mo(6)-O(14) <sup>i</sup>  | 2.109(4)  | C(2AA)-C(0AA)           | 1.381(14) |
| Mo(6)-O(17)               | 1.941(5)  | C(3AA)-C(0AA)           | 1.414(15) |
| Mo(6)-O(30)               | 1.671(5)  | C(3AA)-C(13)            | 1.428(15) |
| Mo(6)-O(31)               | 2.040(5)  | C(3AA)-C(1AA)           | 1.402(15) |
| Mn(1)-O(5) <sup>i</sup>   | 2.226(4)  | C(6)-C(7)               | 1.450(15) |
| Mn(1)-O(5)                | 2.226(4)  | C(6)-C(8)               | 1.420(14) |
| Mn(1)-O(7) <sup>i</sup>   | 2.177(4)  | C(6)-C(13)              | 1.359(14) |
| Mn(1)-O(7)                | 2.177(4)  | C(7)-C(15)              | 1.405(15) |
| Mn(1)-O(8)                | 2.220(4)  | C(7)-C(16)              | 1.378(15) |
| Mn(1)-O(8) <sup>i</sup>   | 2.220(4)  | C(14)-C(19)             | 1.411(17) |
| Mn(2)-O(18)               | 2.146(4)  | C(14)-C(1)              | 1.495(17) |
| Mn(2)-O(18) <sup>ii</sup> | 2.146(4)  | C(15)-C(18)             | 1.395(16) |

---

|                               |            |                                                |           |
|-------------------------------|------------|------------------------------------------------|-----------|
| Mn(2)-O(27)                   | 2.178(5)   | C(16)-C(17)                                    | 1.441(15) |
| Mn(2)-O(27) <sup>ii</sup>     | 2.178(5)   | C(18)-C(4AA)                                   | 1.392(14) |
| Mn(2)-O(33) <sup>ii</sup>     | 2.212(6)   | C(19)-C(1AA)                                   | 1.359(17) |
| Mn(2)-O(33)                   | 2.212(6)   | O(9W)-N(4)                                     | 1.668(9)  |
| P(1)-O(11)                    | 1.556(5)   | C(3)-C(4)                                      | 1.377(5)  |
| P(1)-O(12)                    | 1.550(4)   | C(3)-C(5AA)                                    | 1.377(5)  |
| P(1)-O(13)                    | 1.549(5)   | C(4)-C(17)                                     | 1.377(5)  |
| P(1)-O(18)                    | 1.502(4)   | C(17)-C(4AA)                                   | 1.377(5)  |
| P(1)-Na(2) <sup>iii</sup>     | 3.447(5)   | C(4AA)-N(4)                                    | 1.377(5)  |
| P(2)-O(15)                    | 1.538(5)   | N(4)-C(5AA)                                    | 1.377(5)  |
| P(2)-O(16)                    | 1.580(5)   | C(5AA)-C(2)                                    | 1.554(18) |
| O(5)-Mo(1)-Mo(5)              | 48.64(12)  | O(5) <sup>i</sup> -Mn(1)-O(5)                  | 180.0     |
| O(5)-Mo(1)-O(13)              | 80.99(16)  | O(7)-Mn(1)-O(5) <sup>i</sup>                   | 96.58(16) |
| O(5)-Mo(1)-O(14)              | 86.42(18)  | O(7) <sup>i</sup> -Mn(1)-O(5)                  | 96.59(16) |
| O(5)-Mo(1)-O(29)              | 159.92(19) | O(7)-Mn(1)-O(8)                                | 96.14(15) |
| O(13)-Mo(1)-Mo(5)             | 89.50(11)  | O(7)-Mn(1)-O(8) <sup>i</sup>                   | 83.86(15) |
| O(14)-Mo(1)-Mo(5)             | 134.16(13) | O(8) <sup>i</sup> -Mn(1)-O(5)                  | 96.45(16) |
| O(14)-Mo(1)-O(13)             | 72.40(16)  | O(8)-Mn(1)-O(8) <sup>i</sup>                   | 180.0     |
| O(6)-Mo(2)-Mo(4)              | 133.71(12) | O(18)-Mn(2)-O(18) <sup>ii</sup>                | 180.0     |
| O(6)-Mo(2)-O(12) <sup>i</sup> | 72.76(15)  | O(18) <sup>ii</sup> -Mn(2)-O(27) <sup>ii</sup> | 82.31(17) |
| O(8)-Mo(2)-Mo(4)              | 49.22(12)  | O(18)-Mn(2)-O(33) <sup>ii</sup>                | 90.8(2)   |
| O(8)-Mo(2)-O(6)               | 85.45(17)  | O(27) <sup>ii</sup> -Mn(2)-O(33)               | 87.6(2)   |
| O(21)-Mo(2)-O(6)              | 97.8(2)    | O(33)-Mn(2)-O(33) <sup>ii</sup>                | 180.0     |
| O(21)-Mo(2)-O(8)              | 102.9(2)   | O(12)-P(1)-O(11)                               | 107.0(2)  |
| O(21)-Mo(2)-O(9)              | 105.0(2)   | O(13)-P(1)-O(11)                               | 108.2(2)  |
| O(7)-Mo(3)-O(6)               | 85.46(17)  | O(13)-P(1)-O(12)                               | 107.5(2)  |
| O(7)-Mo(3)-O(12) <sup>i</sup> | 81.98(16)  | O(18)-P(1)-O(11)                               | 111.4(3)  |
| O(7)-Mo(3)-O(20)              | 159.89(18) | O(18)-P(1)-O(12)                               | 113.8(2)  |
| O(17)-Mo(3)-O(6)              | 157.62(19) | O(18)-P(1)-O(13)                               | 108.7(3)  |
| O(17)-Mo(3)-O(7)              | 96.27(18)  | O(15)-P(2)-O(16)                               | 107.0(3)  |
| O(17)-Mo(3)-O(20)             | 86.55(19)  | O(20)-P(2)-O(15)                               | 109.1(3)  |
| O(8)-Mo(4)-O(24)              | 160.1(2)   | O(20)-P(2)-O(16)                               | 105.8(3)  |
| O(9)-Mo(4)-O(19)              | 155.86(19) | O(27)-P(2)-O(15)                               | 113.7(3)  |
| O(9)-Mo(4)-O(24)              | 85.52(19)  | O(27)-P(2)-O(16)                               | 105.0(3)  |
| O(24)-Mo(4)-O(19)             | 85.51(18)  | O(27)-P(2)-O(20)                               | 115.3(3)  |
| O(28)-Mo(4)-O(8)              | 101.2(2)   | O(24)-P(3)-O(32) <sup>i</sup>                  | 111.5(3)  |
| O(28)-Mo(4)-O(9)              | 105.2(2)   | O(24)-P(3)-O(35)                               | 108.4(3)  |
| O(5)-Mo(5)-O(11)              | 82.48(16)  | O(32) <sup>i</sup> -P(3)-O(35)                 | 105.7(3)  |
| O(5)-Mo(5)-O(19) <sup>i</sup> | 87.10(18)  | O(34)-P(3)-O(24)                               | 111.7(3)  |
| O(5)-Mo(5)-O(32)              | 161.99(19) | O(34)-P(3)-O(32) <sup>i</sup>                  | 110.0(3)  |
| O(22)-Mo(5)-O(5)              | 95.68(19)  | O(34)-P(3)-O(35)                               | 109.4(3)  |
| O(22)-Mo(5)-O(11)             | 81.77(18)  | O(29) <sup>i</sup> -P(4)-O(37)                 | 107.5(4)  |
| O(25)-Mo(5)-O(5)              | 101.6(2)   | O(31)-P(4)-O(29) <sup>i</sup>                  | 111.2(3)  |
| O(25)-Mo(5)-O(11)             | 169.4(2)   | O(31)-P(4)-O(37)                               | 108.4(3)  |

|                               |           |                              |          |
|-------------------------------|-----------|------------------------------|----------|
| O(7)-Mo(6)-Mo(3)              | 49.10(12) | O(1)-P(4)-O(29) <sup>i</sup> | 111.8(3) |
| O(7)-Mo(6)-O(13) <sup>i</sup> | 79.40(16) | O(1)-P(4)-O(31)              | 111.3(4) |
| O(7)-Mo(6)-O(14) <sup>i</sup> | 87.64(17) | O(1)-P(4)-O(37)              | 106.4(4) |
| O(7)-Mo(6)-O(31)              | 159.6(2)  |                              |          |

Symmetry codes: i = -x, 1-y, 2-z; ii = -x, 2-y, 2-z.

**Table S5** Selected bond lengths (Å) and bond angles (°) of compound **4**.

|              |            |                             |           |
|--------------|------------|-----------------------------|-----------|
| Mo(1)-Mo(2)  | 2.5972(10) | P (4)-O(41)                 | 1.565(10) |
| Mo(1)-O(6)   | 1.971(5)   | P(4)-O(42)                  | 1.493(8)  |
| Mo(1)-O(11)  | 2.104(6)   | O(17)-Na(22)                | 2.388(8)  |
| Mo(1)-O(141) | 2.276(6)   | O(30)-Zn(21)                | 1.950(8)  |
| Mo(1)-O(19)  | 1.945(6)   | O(30)-Zn(23)                | 2.000(8)  |
| Mo(1)-O(21)  | 2.065(6)   | O(30)-Zn(2A) <sup>iii</sup> | 1.866(7)  |
| Mo(1)-O(29)  | 1.667(6)   | O(30)-Zn(2A) <sup>i</sup>   | 1.964(7)  |
| Mo(2)-O(6)   | 1.967(5)   | O(32)-Na(2)                 | 2.883(10) |
| Mo(2)-O(81)  | 2.129(5)   | O(33)-Na(2)                 | 2.411(8)  |
| Mo(2)-O(10)  | 2.282(5)   | O(33)-Zn(2)                 | 2.398(10) |
| Mo (2)-O(19) | 1.933(6)   | O(33)-Zn(2A)                | 1.803(9)  |
| Mo(2)-O(25)  | 2.074(6)   | O(34)-Na(22)                | 2.739(11) |
| Mo(2)-O(27)  | 1.673(6)   | O(50) <sup>ii</sup> -Na(22) | 2.858(13) |
| Mo(3)-Mo(5)  | 2.5856(11) | N(1)-C(4)                   | 1.473(13) |
| Mo(3)-O(7)   | 1.962(5)   | C(4)-C(10)                  | 1.350(15) |
| Mo(3)-O(8)   | 2.134(5)   | C(4)-C(11)                  | 1.364(14) |
| Mo(3)-O(101) | 2.265(5)   | O(3W)-Na(2)                 | 2.346(11) |
| Mo(3)-O(13)  | 1.935(6)   | C (6)-C(11)                 | 1.393(16) |
| Mo(3)-O(18)  | 2.079(6)   | C(6)-C(12)                  | 1.401(15) |
| Mo(3)-O(26)  | 1.680(6)   | N(2)-C(19)                  | 1.330(15) |
| Mo(4)-Mo(6)  | 2.5878(11) | N(2)-C(26)                  | 1.366(16) |
| Mo(4)-O(9)   | 2.098(6)   | O(2W)-Zn(21)                | 2.226(12) |
| Mo (4)-O(12) | 1.986(6)   | O(2W)-Zn(2A) <sup>iii</sup> | 2.089(12) |
| Mo(4)-O(17)  | 1.930(6)   | C(9)-C(12)                  | 1.484(15) |
| Mo(4)-O(23)  | 2.306(5)   | C(9)-C(17)                  | 1.398(14) |
| Mo(4)-O(24)  | 1.679(6)   | C(9)-C(20)                  | 1.387(15) |
| Mo (4)-O(28) | 2.076(6)   | C(10)-C(15)                 | 1.379(16) |
| Mo(5)-O(7)   | 1.976(5)   | C(12)-C(15)                 | 1.403(14) |
| Mo(5)-O(9)   | 2.097(6)   | N(3)-C(14)                  | 1.422(14) |
| Mo(5)-O(13)  | 1.939(6)   | C(14)-C(21)                 | 1.389(15) |
| Mo(5)-O(20)  | 2.054(6)   | C(14)-C(25)                 | 1.387(16) |
| Mo(5)-O(23)  | 2.304(5)   | O (4W) -Na(2)               | 2.455(14) |
| Mo(5)-O(31)  | 1.672(7)   | C(17)-C(25)                 | 1.378(16) |
| Mo(6)-O(111) | 2.110(6)   | C(19)-C(28)                 | 1.380(17) |
| Mo(6)-O(12)  | 1.981(6)   | C(19)-C(32)                 | 1.487(19) |
| Mo(6)-O(14)  | 2.286(5)   | C(20)-C(21)                 | 1.393(16) |
| Mo(6)-O(17)  | 1.926(6)   | C(22)-C(24)                 | 1.411(17) |
| Mo (6)-O(22) | 1.678(6)   | C(22)-C(28)                 | 1.345(18) |

|                    |            |                    |           |
|--------------------|------------|--------------------|-----------|
| Mo(6)-O(34)        | 2.048(7)   | C(23)-C(24)        | 1.388(18) |
| Mo(6)-Na(22)       | 3.652(5)   | C(23)-C(30)        | 1.357(17) |
| Zn(1)-O(61)        | 2.227(5)   | C(24)-C(26)        | 1.404(17) |
| Zn(1)-O(6)         | 2.227(5)   | C(26)-C(31)        | 1.386(16) |
| Zn(1)-O(7)         | 2.187(5)   | C(27)-C(30)        | 1.450(19) |
| Zn(1)-O(71)        | 2.187(6)   | C(27)-C(31)        | 1.303(19) |
| Zn(1)-O(121)       | 2.178(6)   | C(29)-C(30)        | 1.47(2)   |
| Zn(1)-O(12)        | 2.177(6)   | C(29)-C(33)        | 1.38(2)   |
| P(1)-O(10)         | 1.562(6)   | C(29)-C(37)        | 1.38(2)   |
| P(1)-O(141)        | 1.543(6)   | C(33)-C(38)        | 1.39(2)   |
| P(1)-O(231)        | 1.540(6)   | C(37)-C(36)        | 1.397(19) |
| P(1)-O(30)         | 1.496(6)   | C(38)-C(35)        | 1.29(2)   |
| P(2)-O(18)         | 1.534(6)   | C(1)-C(40)         | 1.341(7)  |
| P(2)-O(251)        | 1.530(6)   | C(1)-C(34)         | 1.341(7)  |
| P(2)-O(32)         | 1.540(7)   | C(40)-C(36)        | 1.341(7)  |
| P(2)-O(33)         | 1.508(7)   | C(36)-C(35)        | 1.340(7)  |
| P(2)-Na(2)         | 3.257(5)   | C(35)-N(4)         | 1.341(7)  |
| P(3)-O(211)        | 1.529(7)   | N(4)-C(34)         | 1.340(7)  |
| P(3)-O(34)         | 1.518(7)   | C(34)-C(2)         | 1.38(3)   |
| P(3)-O(37)         | 1.514(8)   | Na(2)-Zn(2A)       | 3.571(6)  |
| P(3)-O(50)         | 1.542(9)   | Zn(2)-Zn(22)       | 2.455(11) |
| P(3)-Na(22)        | 3.456(6)   | Zn(2)-O(7W)        | 1.366(16) |
| P(4)-O(20)         | 1.521(7)   | Zn(2A)-Zn(2A)      | 2.256(8)  |
| P(4)-O(28)         | 1.524(7)   | Zn(2A)-O(7W)       | 2.309(17) |
| O(6)-Mo(1)-Mo(2)   | 48.67(16)  | O(9)-Mo(5)-O(23)   | 74.0(2)   |
| O(6)-Mo(1)-O(11)   | 85.7(2)    | O(13)-Mo(5)-O(7)   | 95.2(2)   |
| O(6)-Mo(1)-O(21)   | 160.0(2)   | O(13)-Mo(5)-O(9)   | 156.8(2)  |
| O(11)-Mo(1)-O(141) | 73.1(2)    | O(20)-Mo(5)-O(23)  | 79.5(2)   |
| O(19)-Mo(1)-Mo(2)  | 47.76(17)  | O(31)-Mo(5)-O(7)   | 102.4(3)  |
| O(21)-Mo(1)-O(11)  | 85.1(2)    | O(17)-Mo(6)-O(34)  | 84.1(3)   |
| O(29)-Mo(1)-O(19)  | 104.9(3)   | O(22)-Mo(6)-O(14)  | 168.6(3)  |
| O(29)-Mo(1)-O(21)  | 96.7(3)    | O(22)-Mo(6)-O(17)  | 107.3(3)  |
| O(6)-Mo(2)-O(81)   | 85.9(2)    | O(22)-Mo(6)-O(34)  | 96.8(3)   |
| O(6)-Mo(2)-O(10)   | 82.0(2)    | O(34)-Mo(6)-O(14)  | 79.1(3)   |
| O(81)-Mo(2)-O(10)  | 72.7(2)    | O(34)-Mo(6)-Na(22) | 47.9(3)   |
| O(10)-Mo(2)-Mo(1)  | 89.32(13)  | O(61)-Zn(1)-O(6)   | 180.0     |
| O(19)-Mo(2)-Mo(1)  | 48.15(17)  | O(7)-Zn(1)-O(61)   | 96.8(2)   |
| O(25)-Mo(2)-Mo(1)  | 135.30(17) | O(12)-Zn(1)-O(61)  | 96.0(2)   |
| O(27)-Mo(2)-O(6)   | 103.5(3)   | O(121)-Zn(1)-O(7)  | 85.2(2)   |
| O(7)-Mo(3)-O(8)    | 86.2(2)    | O(121)-Zn(1)-O(71) | 94.8(2)   |
| O(8)-Mo(3)-O(101)  | 73.0(2)    | O(12)-Zn(1)-O(7)   | 94.8(2)   |
| O(13)-Mo(3)-O(7)   | 95.8(2)    | O(30)-P(1)-O(10)   | 109.7(3)  |
| O(18)-Mo(3)-O(8)   | 84.0(2)    | O(30)-P(1)-O(141)  | 110.4(3)  |
| O(18)-Mo(3)-O(101) | 80.2(2)    | O(18)-P(2)-O(32)   | 108.3(4)  |

|                   |            |                   |          |
|-------------------|------------|-------------------|----------|
| O(26)-Mo(3)-O(8)  | 95.4(3)    | O(33)-P(2)-O(32)  | 105.5(4) |
| O(9)-Mo(4)-Mo(6)  | 134.12(16) | O(33)-P(2)-Na(2)  | 44.0(3)  |
| O(9)-Mo(4)-O(23)  | 73.9(2)    | O(211)-P(3)-O(50) | 110.1(4) |
| O(12)-Mo(4)-O(9)  | 85.8(2)    | O(37)-P(3)-O(211) | 111.4(4) |
| O(12)-Mo(4)-O(23) | 81.9(2)    | O(37)-P(3)-O34    | 108.3(5) |
| O(12)-Mo(4)-O(28) | 160.1(2)   | O(37)-P(3)-O(50)  | 109.5(6) |
| O(17)-Mo(4)-O(28) | 86.5(3)    | O(20)-P(4)-O(28)  | 112.6(4) |
| O(23)-Mo(4)-Mo(6) | 89.19(14)  | O(20)-P(4)-O(41)  | 105.9(5) |
| O(24)-Mo(4)-O(17) | 105.1(3)   | O(28)-P(4)-O(41)  | 105.6(5) |
| O(24)-Mo(4)-O(23) | 170.4(3)   | O(42)-P(4)-O(20)  | 113.9(5) |
| O(24)-Mo(4)-O(28) | 96.4(3)    | O(42)-P(4)-O(28)  | 112.3(5) |
| O(28)-Mo(4)-O(9)  | 84.9(2)    | O(42)-P(4)-O(41)  | 105.7(6) |
| O(7)-Mo(5)-O(9)   | 85.7(2)    |                   |          |

Symmetry codes: i = 1-x, 2-y, 1-z; ii = 1-x, 3-y, 1-z; iii = x, 1+y, z.

**Table S6** The hydrogen bond lengths (Å) and angles (°) in compound **1**.

| Donor-H $\cdots$ Acceptor   | D-H [Å] | H $\cdots$ A [Å] | D $\cdots$ A [Å] | D-H $\cdots$ A [°] |
|-----------------------------|---------|------------------|------------------|--------------------|
| N(1)-H(1B) $\cdots$ O(1W)   | 0.86    | 2.13             | 2.877(13)        | 145                |
| N(2)-H(2A) $\cdots$ O(18)   | 0.89    | 2.55             | 3.370(8)         | 154                |
| N(3)-H(3) $\cdots$ O(31)    | 0.86    | 1.88             | 2.732(11)        | 170                |
| N(4)-H(4) $\cdots$ O(2W)    | 0.86    | 1.77             | 2.63(2)          | 172                |
| C(5)-H(5C) $\cdots$ O(2W)   | 0.96    | 2.48             | 3.27(2)          | 139                |
| C(7)-H(7) $\cdots$ O(28)    | 0.93    | 2.41             | 3.317(14)        | 164                |
| C(12)-H(12) $\cdots$ O(29)  | 0.93    | 2.53             | 3.367(12)        | 150                |
| C(14)-H(14) $\cdots$ O(3W)  | 0.93    | 2.59             | 3.400(19)        | 146                |
| C(18)-H(18) $\cdots$ O(29)  | 0.93    | 2.41             | 3.190(14)        | 142                |
| C(19)-H(19A) $\cdots$ O(31) | 0.96    | 2.55             | 3.363(12)        | 143                |
| C(41)-H(41) $\cdots$ O(15)  | 0.93    | 2.55             | 3.432(10)        | 158                |

**Table S7** The hydrogen bond lengths (Å) and angles (°) in compound **2**.

| Donor-H $\cdots$ Acceptor   | D-H [Å] | H $\cdots$ A [Å] | D $\cdots$ A [Å] | D-H $\cdots$ A [°] |
|-----------------------------|---------|------------------|------------------|--------------------|
| N(1)-H(1A) $\cdots$ O(17)   | 0.89    | 2.60             | 3.387(10)        | 149                |
| N(2)-H(2A) $\cdots$ O(34)   | 0.86    | 2.27             | 2.982(12)        | 140                |
| N(3)-H(3) $\cdots$ O(36)    | 0.86    | 1.89             | 2.737(13)        | 170                |
| N(4)-H(4) $\cdots$ O(2W)    | 0.86    | 1.75             | 2.606(19)        | 173                |
| C(2)-H(2) $\cdots$ O(21)    | 0.93    | 2.38             | 3.115(13)        | 136                |
| C(42)-H(42) $\cdots$ O(24)  | 0.93    | 2.55             | 3.430(13)        | 158                |
| C(55)-H(55) $\cdots$ O(30)  | 0.93    | 2.54             | 3.357(15)        | 146                |
| C(62)-H(62) $\cdots$ O(30)  | 0.93    | 2.45             | 3.219(15)        | 140                |
| C(64)-H(64) $\cdots$ O(23)  | 0.93    | 2.56             | 3.391(15)        | 149                |
| C(66)-H(66) $\cdots$ O(29)  | 0.93    | 2.41             | 3.317(15)        | 164                |
| C(75)-H(75B) $\cdots$ O(36) | 0.96    | 2.55             | 3.361(14)        | 143                |



**Table S8** The hydrogen bond lengths (Å) and angles (°) of compound **3**.

| Donor-H $\cdots$ Acceptor  | D-H [Å] | H $\cdots$ A [Å] | D $\cdots$ A [Å] | D-H $\cdots$ A [°] |
|----------------------------|---------|------------------|------------------|--------------------|
| N(1)-H(1D) $\cdots$ O(32)  | 0.89    | 2.24             | 2.968(8)         | 139                |
| N(2)-H(2A) $\cdots$ O(37)  | 0.87    | 2.23             | 2.997(11)        | 146                |
| N(3)-H(3A) $\cdots$ O(3W)  | 0.93    | 2.54             | 3.351(18)        | 146                |
| C(3)-H(6) $\cdots$ O(4W)   | 0.93    | 2.38             | 3.292(14)        | 168                |
| C(8)-H(8) $\cdots$ O(28)   | 0.93    | 2.44             | 3.187(13)        | 137                |
| C(19)-H(19) $\cdots$ O(29) | 0.93    | 2.46             | 3.257(15)        | 143                |
| C(38)-H(38) $\cdots$ O(23) | 0.93    | 2.54             | 3.435(10)        | 161                |
| C(48)-H(48) $\cdots$ O(1)  | 0.93    | 2.43             | 3.350(12)        | 171                |

**Table S9** The hydrogen bond lengths (Å) and angles (°) of compound **4**.

| Donor-H $\cdots$ Acceptor   | D-H [Å] | H $\cdots$ A [Å] | D $\cdots$ A [Å] | D-H $\cdots$ A [°] |
|-----------------------------|---------|------------------|------------------|--------------------|
| N(1)-H(1A) $\cdots$ O(22)   | 0.89    | 2.42             | 2.982(12)        | 121                |
| N(2)-H(2) $\cdots$ O(42)    | 0.86    | 1.78             | 2.631(14)        | 168                |
| N(3)-H(3A) $\cdots$ O(25)   | 0.88    | 2.17             | 2.986(13)        | 156                |
| C(1)-H(1) $\cdots$ O(28)    | 0.93    | 2.57             | 3.283(16)        | 134                |
| C(10)-H(10) $\cdots$ O(26)  | 0.93    | 2.54             | 3.419(14)        | 158                |
| C(22)-H(22) $\cdots$ O(19)  | 0.93    | 2.53             | 3.444(14)        | 167                |
| C(27)-H(27) $\cdots$ O(29)  | 0.93    | 2.53             | 3.310(15)        | 142                |
| C(32)-H(32A) $\cdots$ O(42) | 0.96    | 2.60             | 3.372(16)        | 138                |
| C(37)-H(37) $\cdots$ O(27)  | 0.93    | 2.56             | 3.394(19)        | 149                |

**Table S10** BVS results of Mo atoms and M centers in **1-4**.

|                   | compound <b>1</b> | compound <b>2</b> | compound <b>3</b> | compound <b>4</b> |
|-------------------|-------------------|-------------------|-------------------|-------------------|
| Mo1               | 5.144             | 5.198             | 5.264             | 5.266             |
| Mo2               | 5.135             | 5.249             | 5.207             | 5.221             |
| Mo3               | 5.236             | 5.302             | 5.297             | 5.179             |
| Mo4               | 5.224             | 5.259             | 5.186             | 5.177             |
| Mo5               | 5.263             | 5.298             | 5.281             | 5.248             |
| Mo6               | 5.249             | 5.255             | 5.250             | 5.242             |
| M(Fe, Co, Mn, Zn) | 1.806             | 1.703             | 1.947             | 1.583             |

**Table S11** Peak potential data (mV) for **1-4** at a sweep rate of 140 mV $\cdot$ s<sup>-1</sup>.

| Scan rate              | $E_a/E_c$ (I) / mV | $E_a/E_c$ (II) / mV | $E_a/E_c$ (III) / mV | $E_a/E_c$ (III) / mV |
|------------------------|--------------------|---------------------|----------------------|----------------------|
| 140 mV s <sup>-1</sup> | $E_{1/2}$          | $E_{1/2}$           | $E_{1/2}$            | $E_{1/2}$            |
| compound <b>1</b>      | 30 / -50           | 260 / 190           | 430 / 350            | 720 / 590            |
|                        | -10                | 225                 | 390                  | 655                  |
| compound <b>2</b>      | 19 / -43           | 250 / 190           | 430 / 360            | 710 / 600            |
|                        | -12                | 220                 | 395                  | 655                  |

|                   |                 |                    |                    |                    |
|-------------------|-----------------|--------------------|--------------------|--------------------|
| compound <b>3</b> | 34 / -66<br>-16 | 280 / 167<br>223.5 | 453 / 316<br>384.5 | 729 / 581<br>655   |
| compound <b>4</b> | 17 / -43<br>-13 | 257 / 180<br>218.5 | 435 / 345<br>390   | 691 / 608<br>649.5 |

**Table S12** Performance comparison of typical photocatalysts for Cr(VI) reduction.

| photocatalysts                                                                    | light source  | dose (mg) | V (mL) | C (mg/L) | time (min) | R (%) | K (min <sup>-1</sup> ) | Ref.      |
|-----------------------------------------------------------------------------------|---------------|-----------|--------|----------|------------|-------|------------------------|-----------|
| GO/g-C <sub>3</sub> N <sub>4</sub> /MoS <sub>2</sub>                              | 300 W Xe lamp | 20        | 50     | 10       | 60         | 88    | 0.0123                 | 1         |
| carbon/SnS <sub>2</sub> /MCS                                                      | 300 W Xe lamp | 50        | 100    | 50       | 120        | 63.2  | 0.00656                | 2         |
| CdS/P <sub>2</sub> Mo <sub>x</sub> W <sub>18-x</sub>                              | 500 W Xe lamp | 30        | 30     | 40       | 100        | 64    | 0.0102                 | 3         |
| Ag/AgCl/NH <sub>2</sub> -UiO-66                                                   | 300 W Xe lamp | 25        | 100    | 20       | 150        | 93    | 0.0177                 | 4         |
| [Zn(mbpy)]<br>{Zn[P <sub>4</sub> Mo <sub>6</sub> O <sub>31</sub> ] <sub>2</sub> } | 10 W LED      | 20        | 15     | 118      | 180        | 94.7  | 0.0163                 | 5         |
| crystal <b>1</b>                                                                  | 10 W LED      | 20        | 15     | 118      | 120        | 86    | 0.016                  | This work |
| crystal <b>2</b>                                                                  | 10 W LED      | 20        | 15     | 118      | 120        | 82    | 0.014                  | This work |
| crystal <b>3</b>                                                                  | 10 W LED      | 20        | 15     | 118      | 120        | 76    | 0.011                  | This work |
| crystal <b>4</b>                                                                  | 10 W LED      | 20        | 15     | 118      | 120        | 72    | 0.010                  | This work |

### Reference:

- 1 M. H. Wu, L. Li, Y. C. Xue, G. Xu, L. Tang, N. Liu and W. Y. Huang, *Appl. Catal., B*, 2018, **228**, 103-112.
- 2 L. Han, Y. L. Zhong, Y. Su, L. T. Wang, L. S. Zhu, X. F. Fei, Y. Z. Dong, G. Hong, Y. T. Zhou and D. Fang, *Chem. Eng. J.*, 2019, **369**, 1138-1149.
- 3 C. X. Liu, W. C. Fang, Y. T. Song, F. Y. Li, Z. X. Sun and L. Xu, *Mater. Sci. Semicond. Process.*, 2020, **120**, 105276.
- 4 Z. G. Zhang, S. Q. Wang, M. Bao, J. Ren, S. Pei, S. Yu and J. Ke, *J. Colloid Interface Sci.*, 2019, **555**, 342-351.
- 5 L. Hou, Y. Zhang, Y. Ma, Y. Wang, Z. Hu, Y. Gao and Z. Han, *Inorg. Chem.*, 2019, **58**, 16667-16675.
